# Supplementary material
Source: MDPI journal article supplement (https://www.mdpi.com/2077-1312/12/4/605)
Supplement: s1 [file s1]

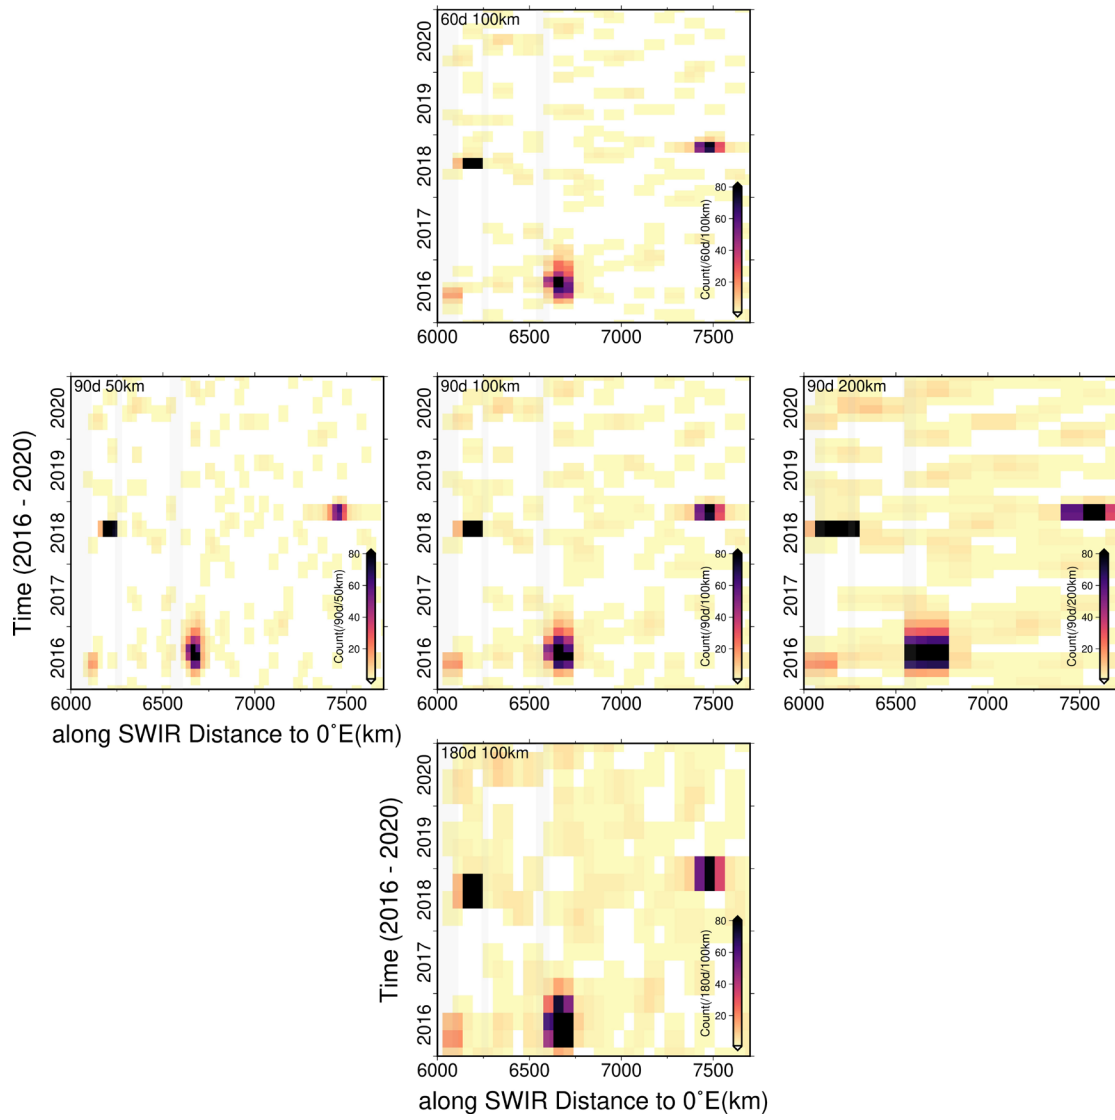

Figure S1 Different search radii on earthquake density

The spatial search radius increases from left to right, respectively at 50 km, 100 km, and 200 km. The temporal search radius increases from top to bottom, respectively at 60 days, 90 days, and 180 days.

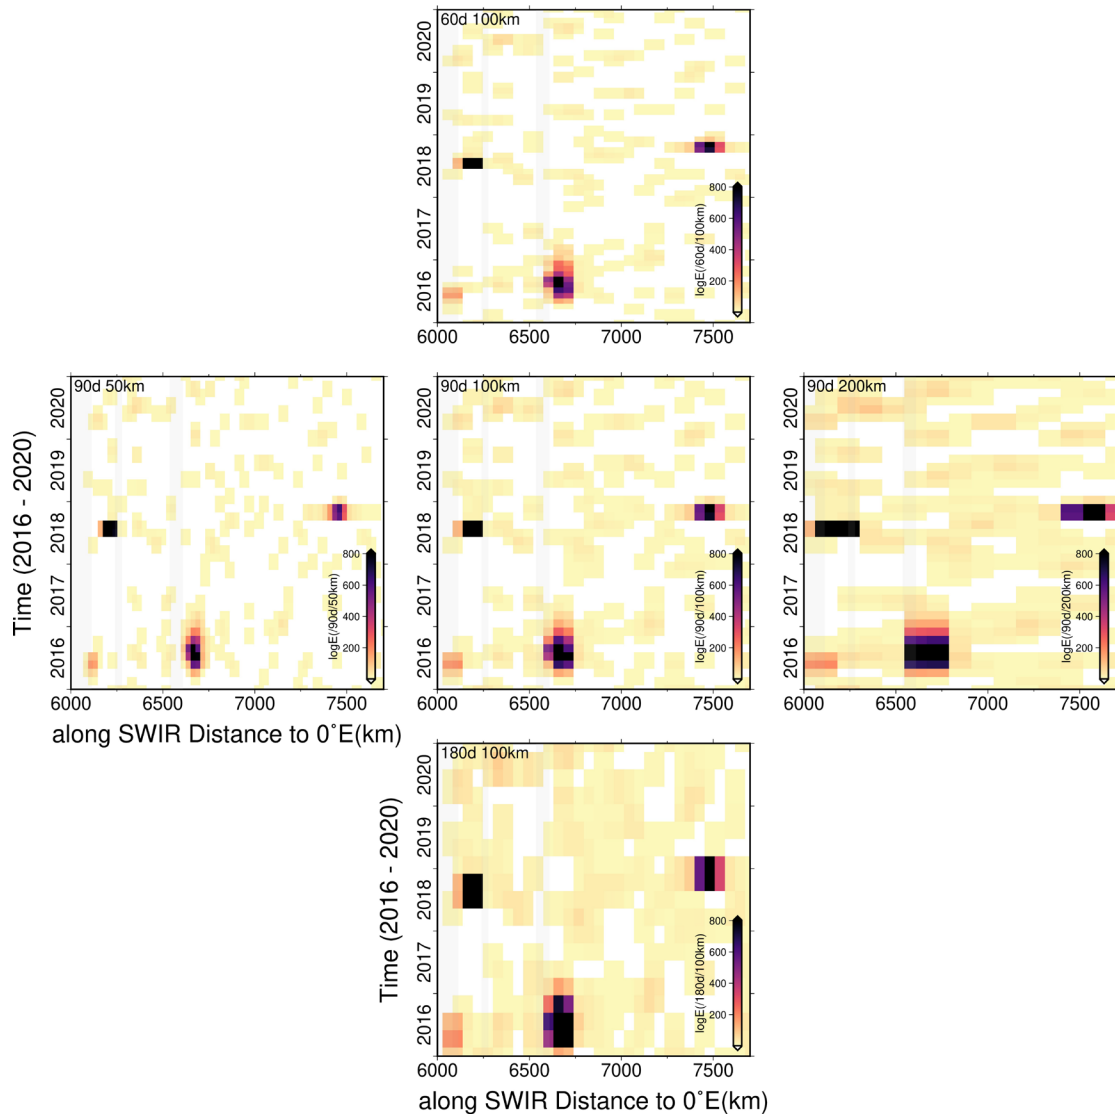

Figure S2 Different search radii on earthquake moment release intensity

The spatial search radius increases from left to right, respectively at 50km, 100km, and 200km;. The temporal search radius increases from top to bottom, respectively at 60 days, 90 days, and 180 days.

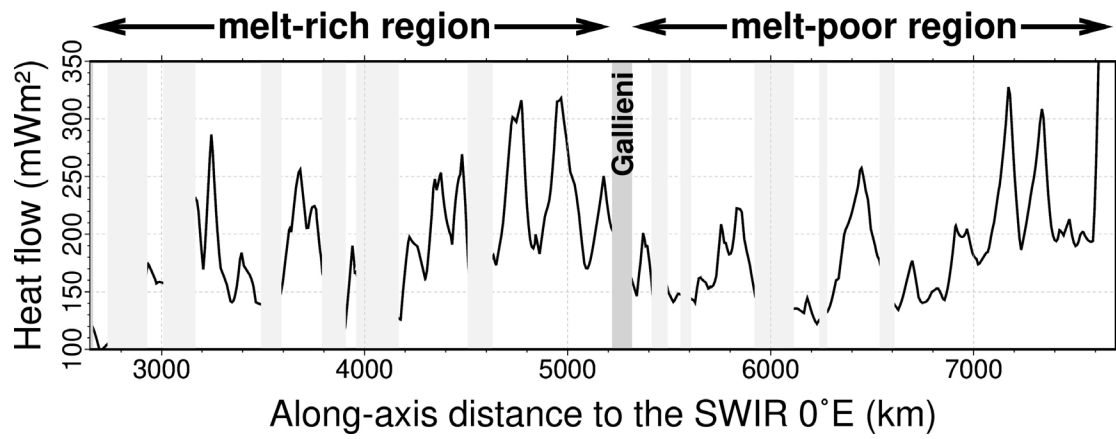

Figure S3 Heat flow [1] along the SWIR axis at distance between 2650 and 7000 km (SWIR 32-70°E)

1. Lucazeau, F. Analysis and Mapping of an Updated Terrestrial Heat Flow Data Set. *Geochemistry, Geophysics, Geosystems* **2019**, 20, 4001-4024, doi:<https://doi.org/10.1029/2019GC008389>.
